# Supplementary material
Source: PubMed Central journal article supplement (PMC6581540)
Supplement: EMS82982-supplement-SI.pdf [file EMS82982-supplement-SI.pdf]

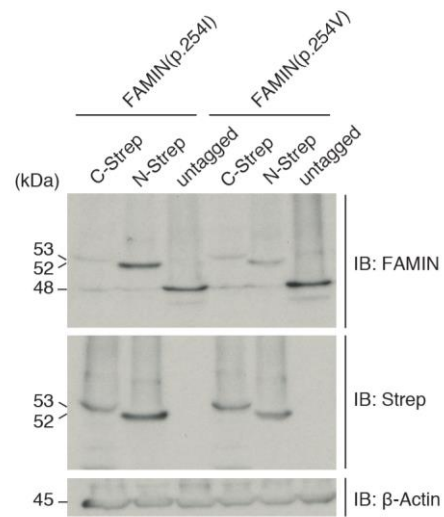

### Supplementary Figure 1

#### Expression of Strep-tagged FAMIN in HEK293T cells.

Immunoblots (IB) of HEK293T lysates expressing N- and C-terminally Strep-tagged FAMIN(p.254I) and FAMIN(p.254V) variants for FAMIN and Strep-tag;  $\beta$ -actin loading control. Data are representative of three independent experiments.

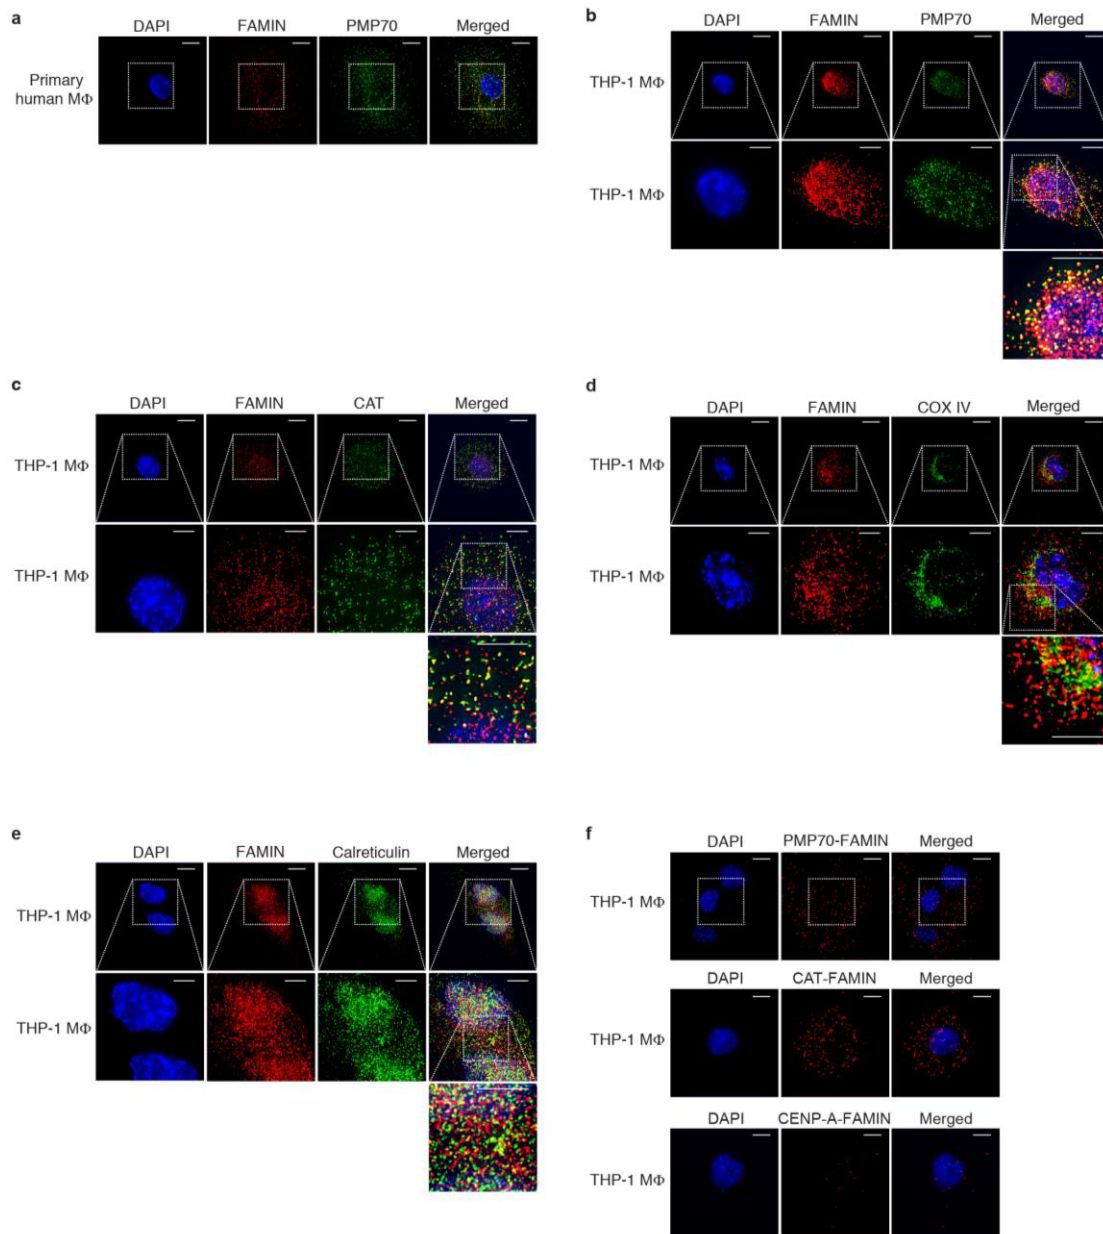

## Supplementary Figure 2

### FAMIN localizes to peroxisomes.

(a) Co-localization by immunofluorescence (IF) of FAMIN (red) with PMP70 (green) in primary human macrophages (MΦ). DAPI nuclear staining, blue; scale bar = 10 μm. White box corresponds to enlarged images shown in **Fig. 1d**. (b–e) Co-localization by IF of FAMIN (red) with PMP70 (green), catalase (green), cytochrome oxidase IV (green) and calreticulin (green) in THP-1 macrophages. DAPI, blue; scale bar = 10 μm for original images and 5 μm for enlarged images. *Upper panels*: original image, *middle panels*: enlargement of the area shown in the white box, *lower panels*: further enlargement as indicated. No significant co-localization of FAMIN was detected with CENP-A, centromere; caveolin-2,

cholesterol/sphingolipid enriched plasma membrane; EEA1 and RAB5, early endosome; LAMP1, lysosomes; NUP98, nuclear envelope; fibrillin, nucleolus and syntaxin 6, trans-Golgi network (data not shown). (f) Proximity-ligation assay (PLA) of FAMIN in combination with PMP70, Catalase (red) or centromere protein A (red) as negative control in THP-1 macrophages. DAPI, blue; scale bar = 10  $\mu$ m. White box corresponds to enlarged images shown in **Fig. 1e**. Data are representative of three independent experiments.

Gene targeting *mFamin*<sup>-/-</sup>

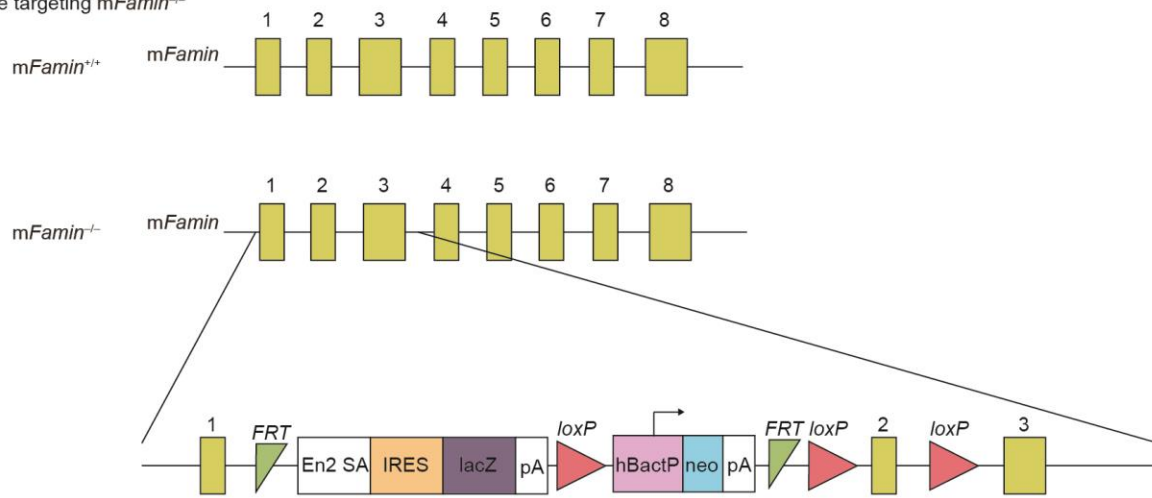

CRISPR/Cas9 *mFamin*(p.254I)

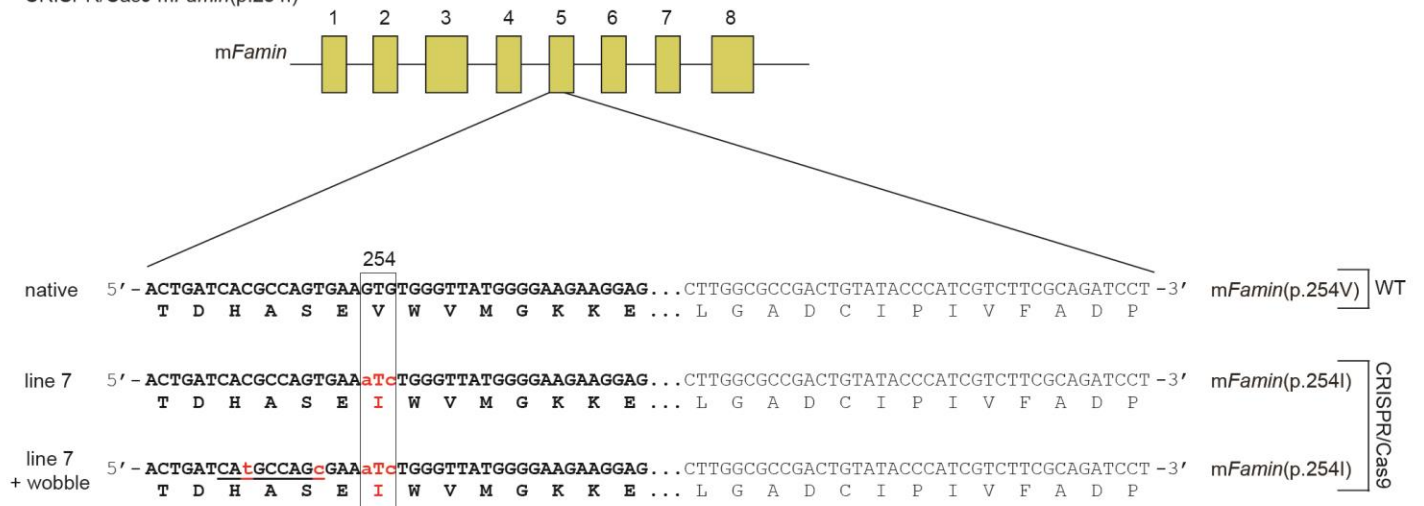

CRISPR/Cas9 *mFamin*(p.284R)

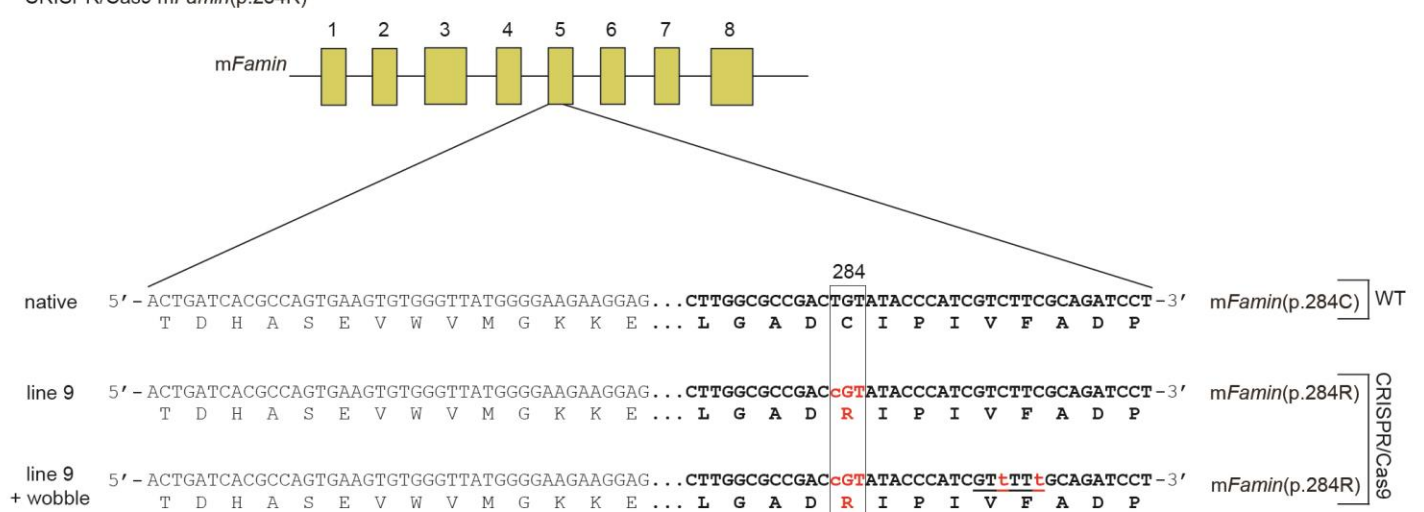

### Supplementary Figure 3

#### Generation of *mFamin*<sup>-/-</sup>, *mFamin*<sup>p254I</sup> and *mFamin*<sup>p284R</sup> mice.

Schematic representation of the targeting strategy for creating a *mFamin*<sup>-/-</sup> allele in murine ES cells. The targeting vector, L1L2\_Bact\_P (International Mouse Knockout Consortium), contains a reading frame-independent *LacZ* gene trap cassette consisting of an *En2* splice acceptor (SA), an internal ribosomal entry site (IRES), *LacZ* gene and a polyadenylation site (PA). The vector also contains a selectable marker consisting of a human  $\beta$ -actin promoter (hBactP), neomycin resistance gene (neo) and a PA site. The vector is flanked by flippase recognition target (FRT) sites to allow removal of the targeting cassette and conditional *mFamin* deletion upon *Cre*-mediated recombination of the *loxP* sites. *mFamin*<sup>p254I</sup> and *mFamin*<sup>p284R</sup> mice were generated by CRISPR/Cas9 genome editing to introduce nucleotide changes to encode p.254I or p.284R amino acids, respectively, at indicated positions. Nucleotides in *mFamin* exon 5 were targeted using guide RNAs, 'line' 7 and 'line' 9, respectively as outlined in the methods. Two different targeting oligodeoxynucleotides were used for each: one containing only the nucleotide changes leading to the amino acid substitutions, the other containing 2 additional synonymous nucleotide changes ('wobble') in the underlined region.

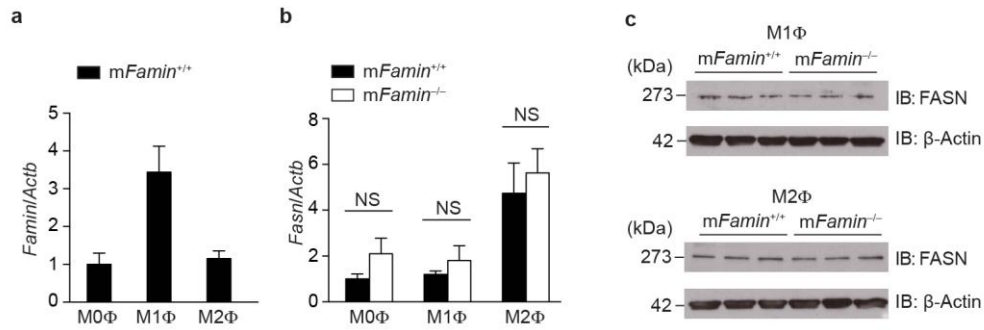

#### Supplementary Figure 4

***Famin* expression is highest in M1 macrophages, and FAMILN deficiency does not affect FASN expression.**

(a) mRNA expression of *Famin* in M0, M1 and M2 macrophages (MΦ). (b) mRNA expression of *Fasn* in M0, M1 and M2 macrophages. (c)

Immunoblots (IB) of FASN in M1 and M2 macrophage cell lysates; β-actin loading control. Data are from one experiment with three mice representative of two (b,c; mean ± S.E.M.) or three independent experiments (c).

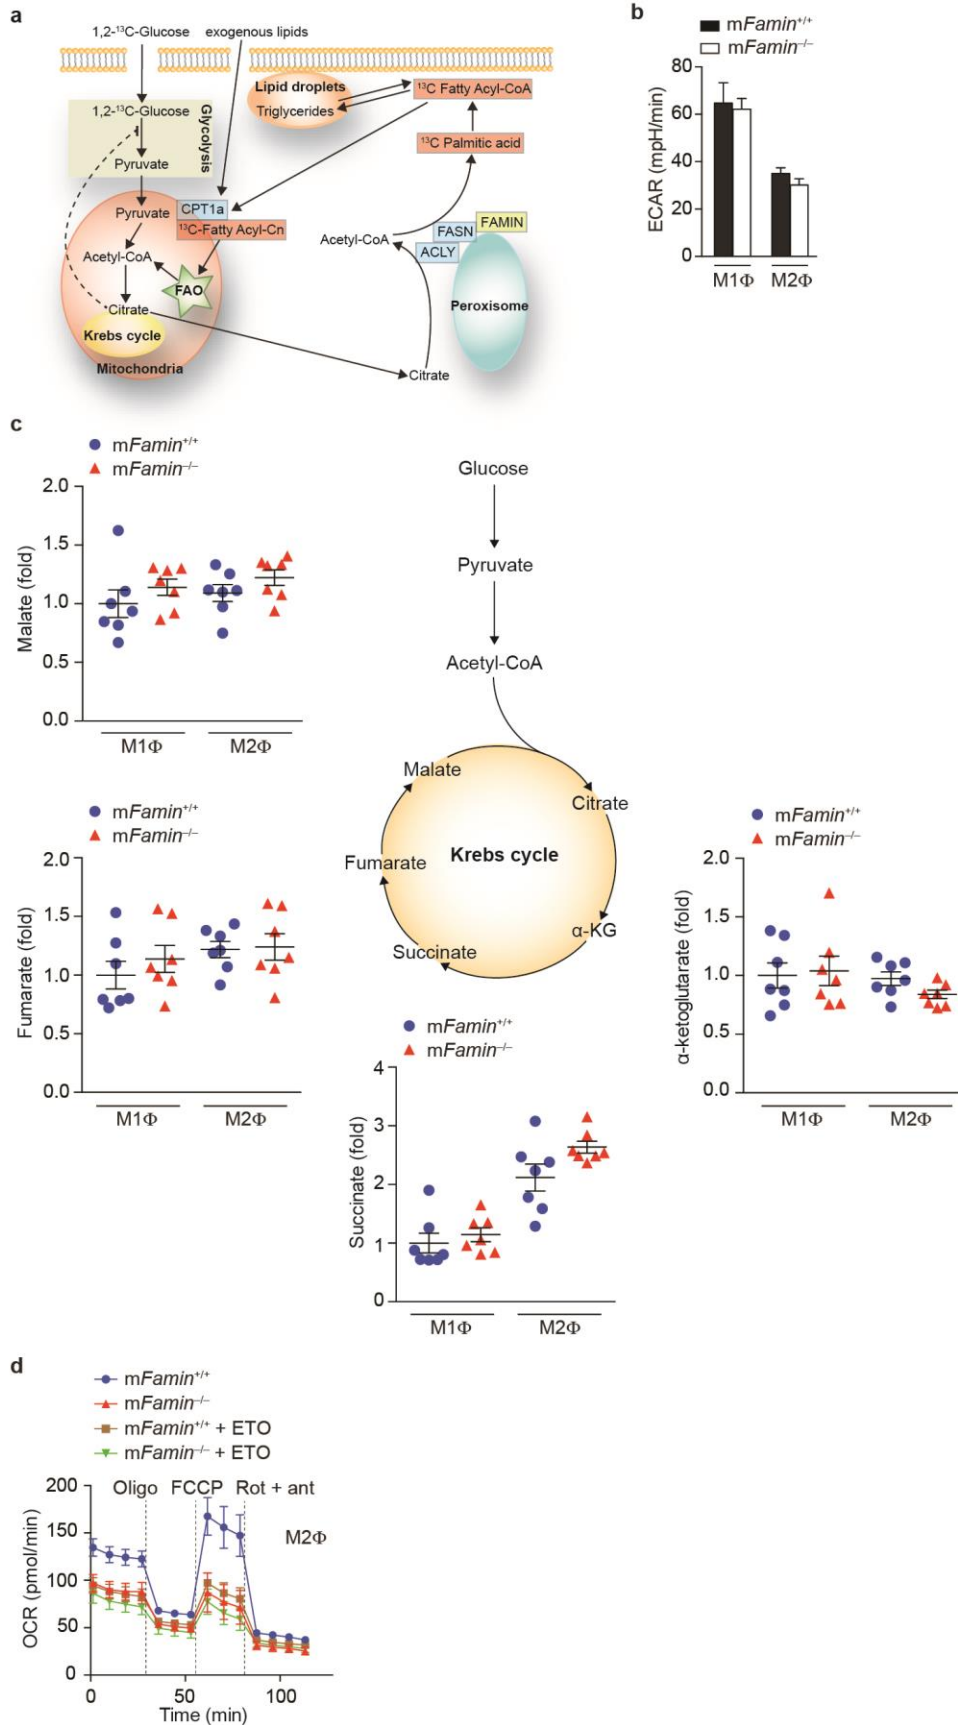

## Supplementary Figure 5

### FAMIN does not directly affect the Krebs cycle.

(a) Schematic representation of 1,2-<sup>13</sup>C-glucose incorporation, via citrate, into fatty acyl species. (b) Basal extracellular acidification rate (ECAR) of *mFamin*<sup>-/-</sup> and *mFamin*<sup>+/+</sup> M1 and M2 macrophages (MΦ) in the presence of exogenous pyruvate ( $n = 5/14$ ). (c) Relative levels of malate, fumarate, succinate and  $\alpha$ -ketoglutarate in M1 and M2 macrophages. (d) Oxygen consumption rate (OCR) of *mFamin*<sup>-/-</sup> and *mFamin*<sup>+/+</sup> M2 macrophages treated as indicated with 40  $\mu$ M etomoxir (ETO) 1 h prior to OCR measurement and followed by sequential treatment (dotted vertical lines) with oligomycin (Oligo), FCCP, and rotenone plus antimycin (Rot + ant). \* $P < 0.05$ , \*\* $P < 0.01$  (Unpaired, two-tailed Student's  $t$ -test). Data are pooled from three independent experiments (b; mean  $\pm$  S.E.M.), from one experiment with seven mice per group (c; mean  $\pm$  S.E.M.) or from one experiment with three mice representative of two independent experiments (d; mean  $\pm$  S.E.M.).



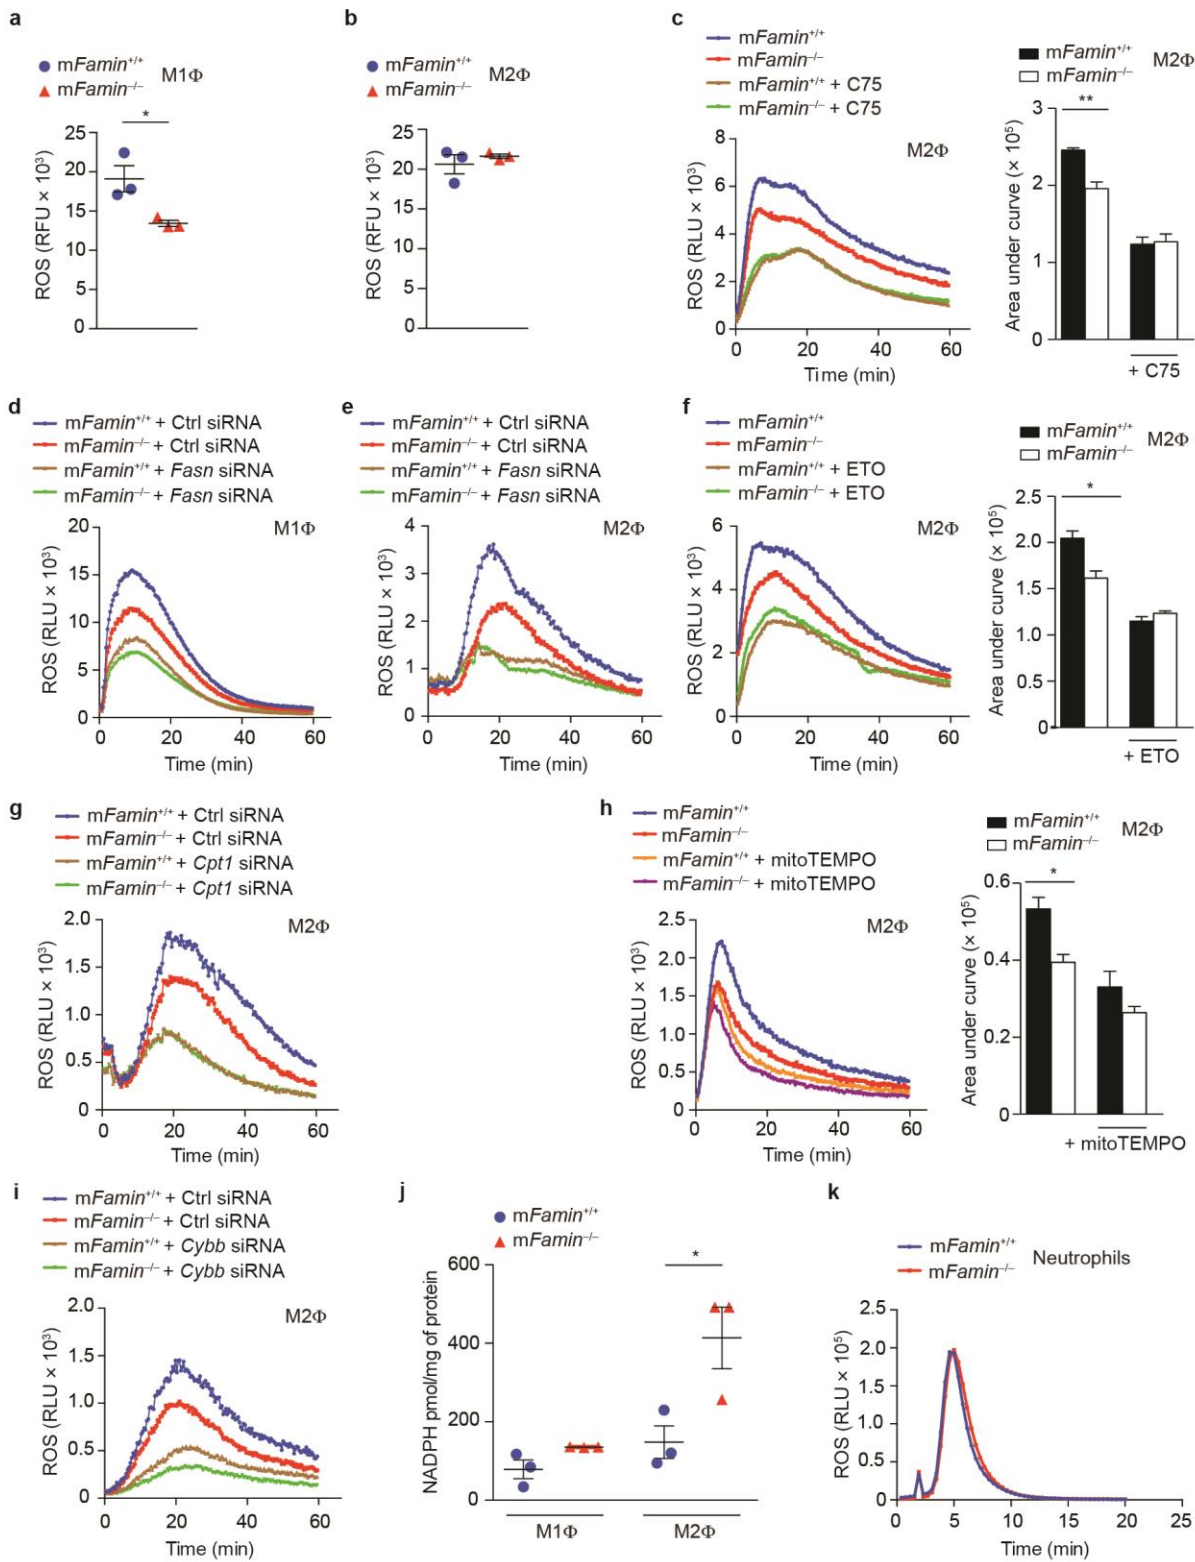

Supplementary Figure 6

**FAMIN-deficient M2 macrophages exhibit impaired mitochondrial ROS- and FAO-dependent production of extracellular ROS.**

(a,b) Intracellular ROS measurement in unstimulated M1 and M2 *mFamin*<sup>-/-</sup> and *mFamin*<sup>+/+</sup> macrophages (MΦ) stained with the cytosolic ROS indicator, 5-(and-6)-chloromethyl-2-7-dichlorodihydrofluorescein diacetate, acetyl ester (CM-H<sub>2</sub>DCFDA) and measured in relative fluorescence units, RFU. (c–i) Zymosan induced eROS production in M1 and M2 macrophages treated as indicated for 16 h with 20 μM C75; or 1 h 40 μM etomoxir (ETO) or 500 μM mitoTEMPO prior to stimulation; or silenced for *Fasn* (*Fasn* siRNA), *Cpt1a* (*Cpt* siRNA) or *Cybb* (*Cybb* siRNA) or scrambled siRNA (Ctrl siRNA); *Left*, eROS kinetic plots measured in relative light units, RLU and *right*, area under curve, AUC. (j) NADPH quantification in M1 and M2 macrophages cell lysates. (k) PMA-induced eROS production in *mFamin*<sup>-/-</sup> and *mFamin*<sup>+/+</sup> neutrophils. \**P* < 0.05, \*\**P* < 0.01 (Unpaired, two-tailed Student's *t*-test). Data are from one experiment with three mice representative of two independent experiments (a–k; mean ± S.E.M.).

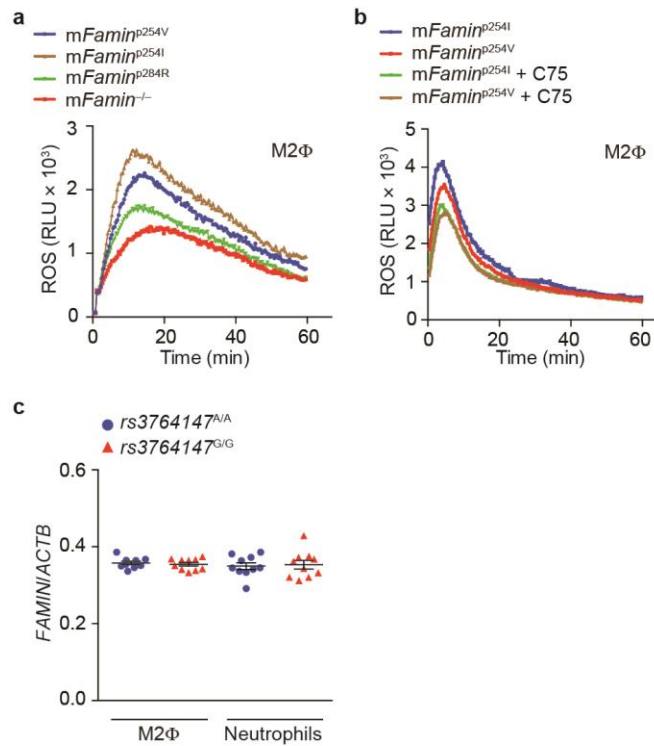

### Supplementary Figure 7

#### FAMIN p.I254V and p.C284R M2 macrophage have impaired eROS production.

(a) Zymosan-stimulated eROS production in  $mFamin^{-/-}$ ,  $mFamin^{p254V}$ ,  $mFamin^{p254I}$  and  $mFamin^{p284R}$  murine M2 macrophages (M $\Phi$ ). (b) Zymosan induced eROS production in  $mFamin^{p254I}$  and  $mFamin^{p254V}$  M2 macrophages treated as indicated for 16 h with 20  $\mu$ M C75. (c) *FAMIN* mRNA expression in M2 macrophages and neutrophils from healthy donors homozygous for the Crohn's disease and leprosy risk ( $rs3764147^{G/G}$ ) and non-risk ( $rs3764147^{A/A}$ ) haplotypes. Data are from one experiment with three mice representative of three independent experiments (a,b; mean  $\pm$  S.E.M.) or pooled from ten independent experiments (c; mean  $\pm$  S.E.M.).

## Supplementary Table 1. FAMIN interacting proteins

| UniProt ID    | Protein name                                                                                                       | No. peptides<br>(Strep-C13orf31) | No. peptides<br>(C13orf31-Strep) | pep_cover<br>(Strep-C13orf31) | pep_cover<br>(C13orf31-Strep) |
|---------------|--------------------------------------------------------------------------------------------------------------------|----------------------------------|----------------------------------|-------------------------------|-------------------------------|
| <b>P49327</b> | <b>Fatty acid synthase</b>                                                                                         | <b>115</b>                       | <b>37</b>                        | <b>26.6</b>                   | <b>10.1</b>                   |
| Q5EFE5        | Anti-RhD monoclonal T125 gamma1 heavy chain                                                                        | 58                               | 37                               | 25.9                          | 10.5                          |
| B4DKR1        | cDNA FLJ51884, highly similar to Mitochondrial inner membrane protein                                              | 28                               | 39                               | 19                            | 29.5                          |
| E9PG19        | FCH and double SH3 domains protein 2                                                                               | 26                               | 31                               | 2.5                           | 3.4                           |
| Q96ST3        | Paired amphipathic helix protein Sin3a                                                                             | 40                               | 16                               | 19.7                          | 9.3                           |
| Q6FHQ0        | RBBP7 protein                                                                                                      | 31                               | 13                               | 39.1                          | 13.4                          |
| Q16531        | DNA damage-binding protein 1                                                                                       | 30                               | 12                               | 14                            | 9.4                           |
| B7Z3V1        | cDNA FLJ60077, highly similar to Sodium/potassium-transporting ATPase alpha-1 chain                                | 27                               | 19                               | 15.7                          | 13.8                          |
| K7EIG1        | Clustered mitochondria protein homolog                                                                             | 24                               | 17                               | 13.1                          | 7.2                           |
| A4D1U5        | Multiple substrate lipid kinase, isoform CRA_a                                                                     | 23                               | 14                               | 32.9                          | 20.4                          |
| Q13263        | Transcription intermediary factor 1-beta                                                                           | 76                               | 0                                | 42.6                          | 0                             |
| P36952        | Serpin B5                                                                                                          | 45                               | 0                                | 48                            | 0                             |
| Q5I6Y6        | Lamin A/C transcript variant 1                                                                                     | 38                               | 0                                | 34.6                          | 0                             |
| P07476        | Involucrin                                                                                                         | 32                               | 0                                | 44.3                          | 0                             |
| Q6N093        | Putative uncharacterised protein DKFZp686I04196                                                                    | 32                               | 0                                | 16.5                          | 0                             |
| P43487        | Ran-specific GTPase-activating protein                                                                             | 32                               | 9                                | 71.1                          | 20.9                          |
| L0R5A1        | Alternative protein CSF2RB                                                                                         | 30                               | 0                                | 7.4                           | 0                             |
| A6NMY3        | Alstrom syndrome protein 1                                                                                         | 29                               | 7                                | 7.4                           | 2.1                           |
| P16152        | Carbonyl reductase [NADPH] 1                                                                                       | 29                               | 0                                | 50.2                          | 0                             |
| Q13228        | Selenium-binding protein 1                                                                                         | 29                               | 0                                | 43                            | 0                             |
| <b>E7DVW5</b> | <b>Fatty acid binding protein 5 (Psoriasis-associated)</b>                                                         | <b>28</b>                        | <b>0</b>                         | <b>35.6</b>                   | <b>0</b>                      |
| P00338-3      | Isoform 3 of L-lactate dehydrogenase A chain                                                                       | 28                               | 0                                | 31.3                          | 0                             |
| Q9HAW4-2      | Isoform 2 of Claspin                                                                                               | 25                               | 0                                | 13.7                          | 0                             |
| B3KWI4        | cDNA FLJ43122 fis, clone CTONG3003737, highly similar to Leucine-rich repeat-containing protein 15                 | 24                               | 0                                | 20.7                          | 0                             |
| P12277        | Creatine kinase B-type                                                                                             | 23                               | 0                                | 30.7                          | 0                             |
| Q9Y2I1        | Nischarin                                                                                                          | 23                               | 0                                | 10.2                          | 0                             |
| B4DDF7        | cDNA FLJ53296, highly similar to Serine/threonine-protein phosphatase 2A 65 kDa regulatory subunit A alpha isoform | 22                               | 10                               | 21.1                          | 12.8                          |
| O14929        | Histone acetyltransferase type B catalytic subunit                                                                 | 22                               | 8                                | 25.1                          | 10.7                          |
| Q9UI33-3      | Isoform 3 of Sodium channel protein type 11 subunit alpha                                                          | 22                               | 0                                | 1.5                           | 0                             |
| Q8IWZ8        | SURP and G-patch domain-containing protein 1                                                                       | 22                               | 0                                | 28.7                          | 0                             |
| Q15007        | Pre-mRNA-splicing regulator WTAP                                                                                   | 21                               | 0                                | 31.3                          | 0                             |
| I3L2N2        | Segment polarity protein dishevelled homolog DVL-2                                                                 | 21                               | 0                                | 17.9                          | 0                             |
| Q8IV20        | FAMIN                                                                                                              | 1157                             | 584                              | 80.5                          | 68.4                          |

**Supplementary Table 2: Free fatty acid quantification in M1 and M2 macrophages**

| Lipid species<br>(ng per sample) | <i>mFAMIN</i> <sup>+/+</sup> |        | <i>mFAMIN</i> <sup>-/-</sup> |        | <i>mFAMIN</i> <sup>+/+</sup> vs <i>mFAMIN</i> <sup>-/-</sup> |                 |
|----------------------------------|------------------------------|--------|------------------------------|--------|--------------------------------------------------------------|-----------------|
|                                  | Mean                         | S.E.M  | Mean                         | S.E.M  | Change                                                       | <i>P</i> -value |
| M1 total free fatty acid         | 38314.72                     | 807.94 | 38651.61                     | 467.48 | 336.88                                                       | 0.7257          |
| M1 C16:0 fatty acid              | 17893.60                     | 208.84 | 17999.37                     | 281.72 | 105.77                                                       | 0.7691          |
| M2 total free fatty acid         | 43177.34                     | 651.22 | 43245.70                     | 869.66 | 68.36                                                        | 0.9511          |
| M2 C16:0 fatty acid              | 22393.77                     | 569.99 | 21739.00                     | 567.95 | -654.77                                                      | 0.4347          |

### Supplementary Table 3: Genotyping primers

| Primer                                          | Sequence                  |
|-------------------------------------------------|---------------------------|
| <i>mFAMIN</i> common                            | AAATTGATGAAGAAAATCTGAGCTG |
| <i>mFAMIN</i> <sup>+/+</sup>                    | GTGGGACTGCTGCTCTCTTC      |
| <i>mFAMIN</i> <sup>-/-</sup>                    | TGTACAAACTTGTTGATATCGTGTT |
| <i>mFAMIN</i> <sup>p.I254V-C284R</sup> Forward* | GCCTCATCTACCACAAAGCA      |
| <i>mFAMIN</i> <sup>p.I254V-C284R</sup> Reverse* | TTCCTAGGAACCACATCTGC      |

\* PCR product submitted for Sanger sequencing as described in the Online methods

### Supplementary Table 4: CRISPR/Cas9 guide RNAs and targeting oligonucleotides

#### a. Guide RNAs

| gRNA                 | Sequence <sup>1</sup>   |
|----------------------|-------------------------|
| tyrex2R              | GCTCCCATCTTCAGCAGATGTGG |
| <i>mFamin</i> Line 7 | TGATCACGCCAGTGAAGTGTGGG |
| <i>mFamin</i> Line 9 | GAAGACGATGGGTATACAGTCGG |

<sup>1</sup> PAM sites in bold

#### b. Targeting oligonucleotides

| oligo                   | Sequence (5' to 3') <sup>2</sup>                                                                                                                               |
|-------------------------|----------------------------------------------------------------------------------------------------------------------------------------------------------------|
| Oligo7                  | TCCTCTCTGATTTGTGACGATCCCATCGTAAGATTCAGGCTCCTTCTTCCCC<br>ATAACCCAg <b>At</b> TTCACTGGCGTGATCAGTCTAACACGAAACACAGAGCAAA<br>ATGTCTGGAAAACGAAACAT                   |
| Oligo7<br><u>wobble</u> | TCCTCTCTGATTTGTGACGATCCCATCGTAAGATTCAGGCTCCTTCTTCCCC<br>ATAACCCAg <b>At</b> TTc <u>g</u> CTGGCa <u>T</u> GATCAGTCTAACACGAAACACAGAGCAAA<br>ATGTCTGGAAAACGAAACAT |
| Oligo9                  | CCTACCGGAGTGAGCAACCCACATGCCTTTTTACAGGATCTGCGAAGA<br>CGATGGGTATAC <b>g</b> GTCGGCGCCAAGAGCAGTGATTGTGACTCCTCTCTGAT<br>TTGTGACGATCCCATCGTAAGA                     |
| Oligo9<br><u>wobble</u> | CCTACCGGAGTGAGCAACCCACATGCCTTTTTACAGGATCTGC <u>a</u> AAA <u>a</u> AC<br>GATGGGTATAC <b>g</b> GTCGGCGCCAAGAGCAGTGATTGTGACTCCTCTCTGATT<br>TGTGACGATCCCATCGTAAGA  |

<sup>2</sup> SNPs in red, with additional sSNPs ('wobble') introduced in two of the lines underlined

**Supplementary Table 5: Quantitative PCR primers**

| <b>Gene</b>   | <b>Forward primer</b> | <b>Reverse primer</b>     |
|---------------|-----------------------|---------------------------|
| <i>mFamin</i> | TGGGGTTGCTCACTCCGGCTG | GGAGACTGCTGATTCTTTGGGAAGA |
| <i>Fasn</i>   | CCCCGGAGTCGCTTGAGTAT  | GGATCTCAGGGTTGGGGTTG      |
| <i>Cpt1a</i>  | TGGCATCATCACTGGTGTGTT | GTCTAGGGTCCGATTGATCTTTG   |
| <i>Cybb</i>   | TGTGGTTGGGGCTGAATGTC  | CTGAGAAAGGAGAGCAGATTTTCG  |
